# Supplementary material for: A Z-scheme ZnFe2O4/RGO/In2O3 hierarchical photocatalyst for efficient CO2 reduction enhancement
Source: Royal Society of Chemistry journal article supplement (doi:10.1039/c9ta13774b), 2020-01-01
Supplement: c9ta13774b1.pdf [file c9ta13774b1.pdf]

Supporting Information

**A Z-scheme ZnFe<sub>2</sub>O<sub>4</sub>/RGO/In<sub>2</sub>O<sub>3</sub> hierarchical photocatalyst for efficient CO<sub>2</sub> reduction enhancement**

Jiadong Li, Feng Wei, Changchang Dong, Wei Mu\*, Xiaojun Han\*

State Key Laboratory of Urban Water Resource and Environment, School of Chemistry and Chemical Engineering, Harbin Institute of Technology, No. 92, West Da-Zhi Street, Harbin, 150001, China.

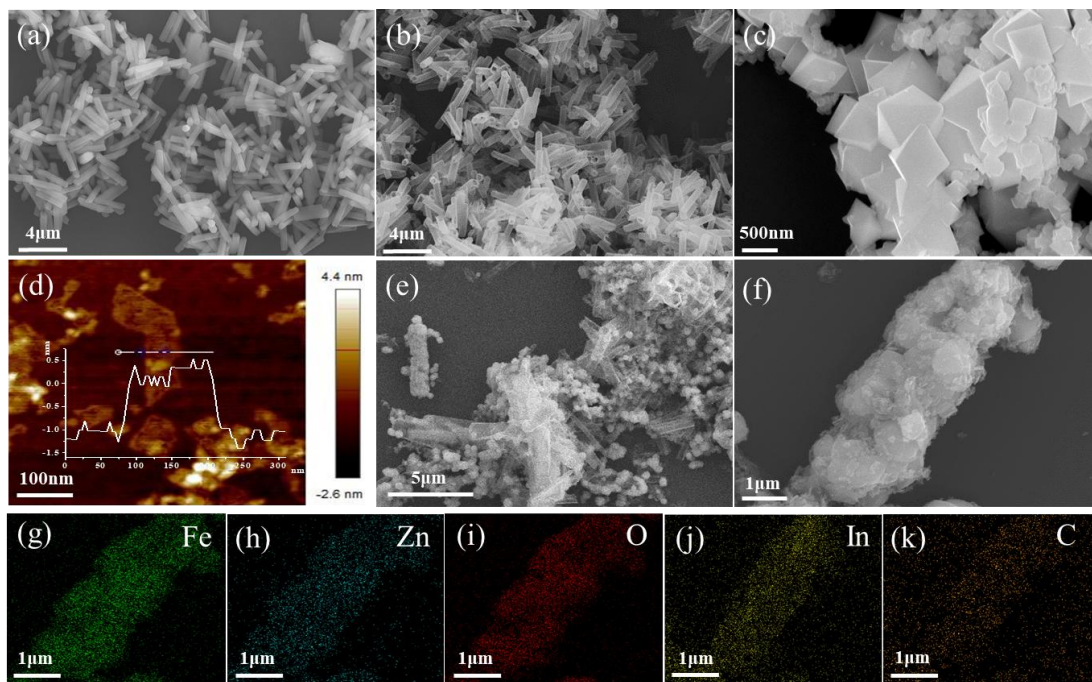

**Figure S1.** SEM images of In-MIL68 (a),  $\text{In}_2\text{O}_3$  tubule. (b),  $\text{ZnFe}_2\text{O}_4$  (c), AFM images (d) of GO, SEM images of 20ZFO/10RGO/IO hierarchical tubule (e, f) and element mapping of 20ZFO/10RGO/IO (g, h, i, j, k), respectively.

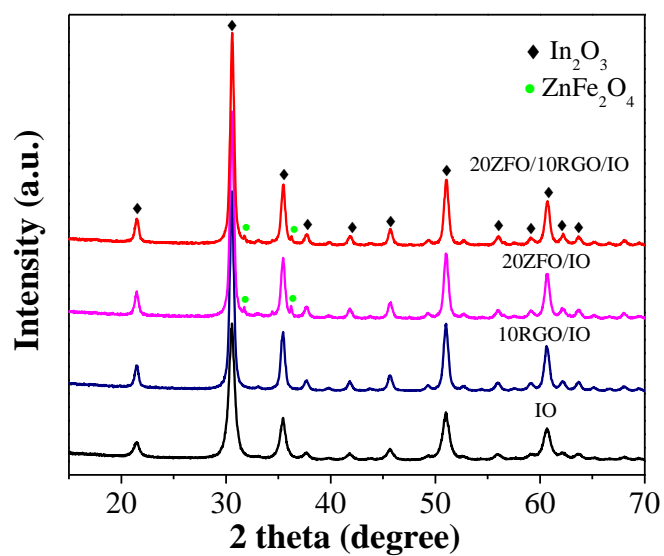

**Figure S2.** XRD patterns of IO, 10RGO/IO, 20ZFO/IO, 20ZFO/10RGO/IO samples

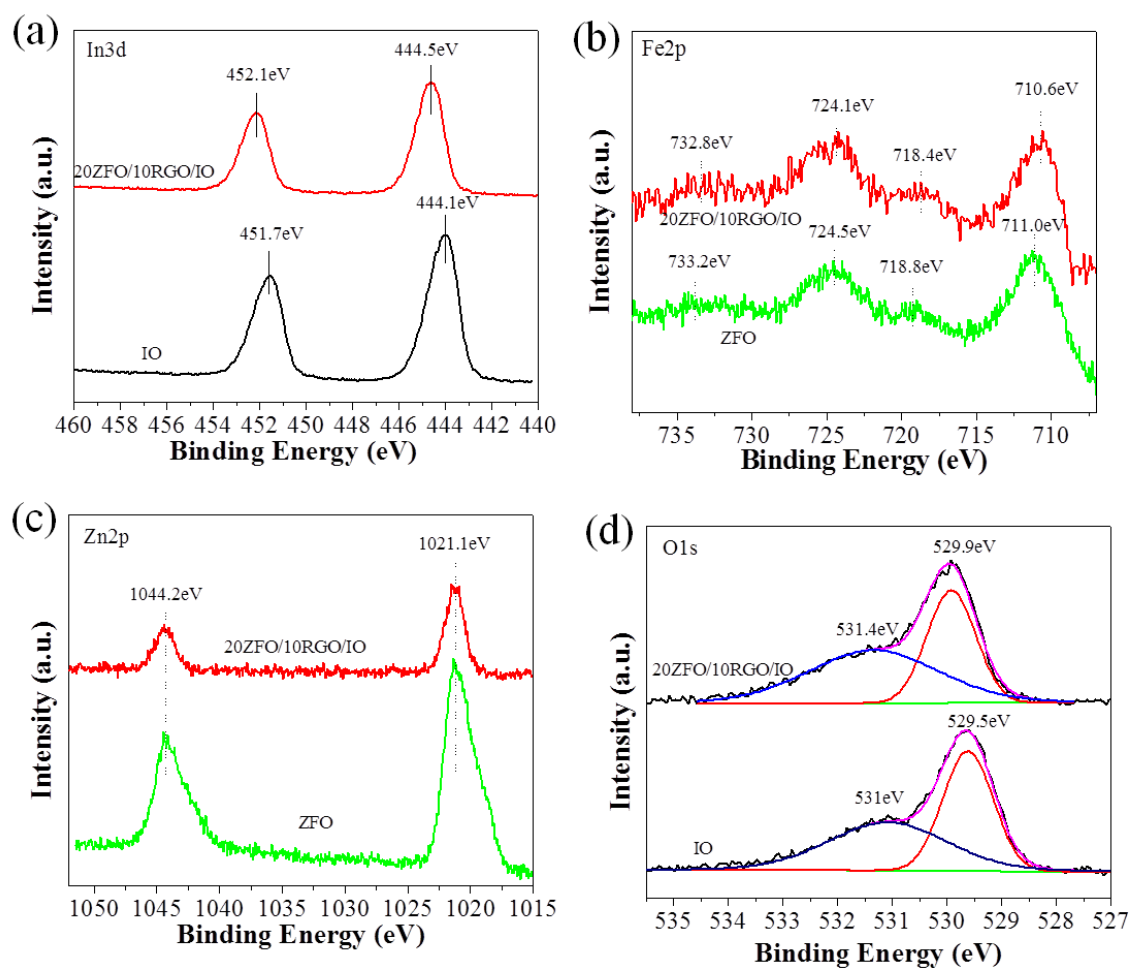

**Figure S3.** In 3d XPS spectra of IO and 20ZFO/10RGO/IO samples (a). Fe 2p (b) and Zn 2p (c) XPS spectra of ZFO and 20ZFO/10RGO/IO samples. O 1s XPS spectra of IO and 20ZFO/10RGO/IO samples (d).

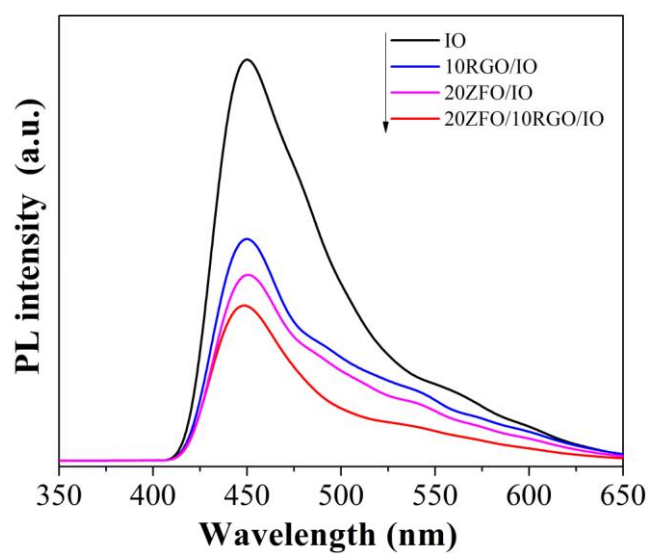

**Figure S4.** Photoluminescence spectra of IO, 10RGO/IO, 20ZFO/IO, 20ZFO/10RGO/IO samples

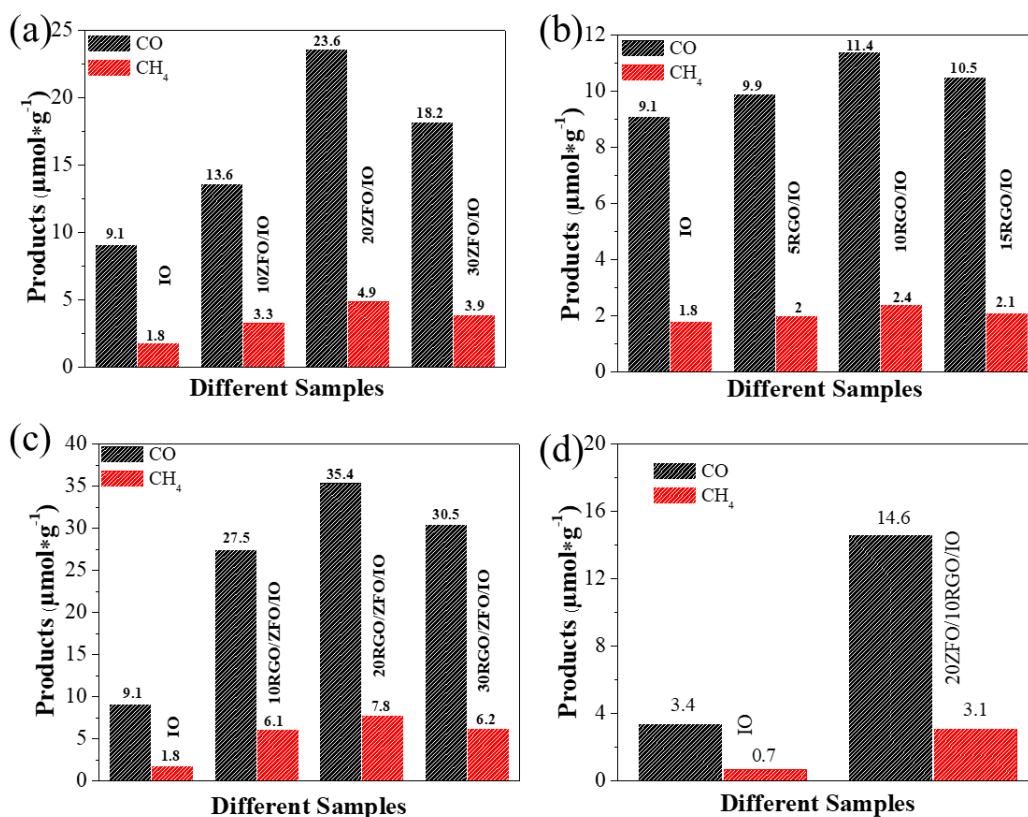

**Figure S5.** Photocatalytic activities for CO<sub>2</sub> reduction of pure IO and different amount of ZFO coupled with IO samples (a), pure IO and different amount of RGO coupled with IO samples (b) and different amount of RGO and ZFO co-coupled IO samples (c) under UV-visible light. Photocatalytic activities for CO<sub>2</sub> reduction (d) of IO and 20ZFO/10RGO/IO under visible light for 4h.

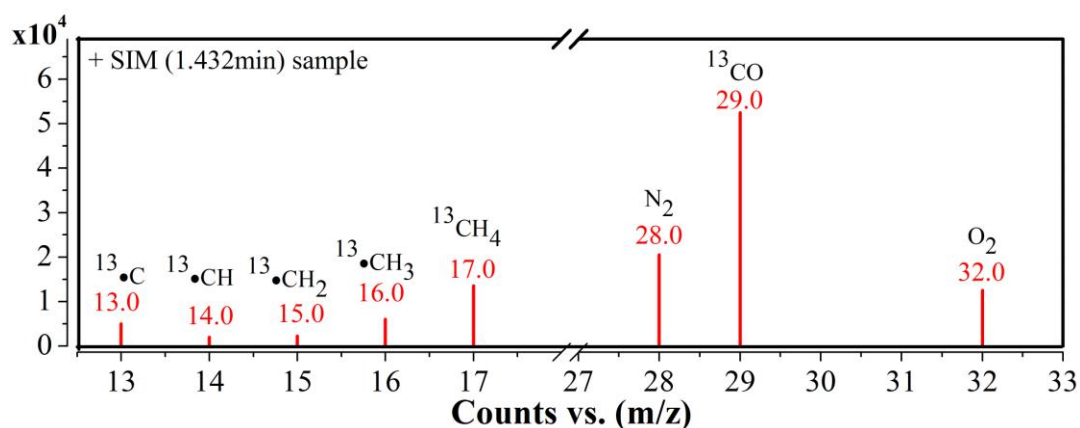

**Figure S6.** Mass spectra of the products over 20ZFO/10RGO/IO in photocatalytic reduction of <sup>13</sup>CO<sub>2</sub>.

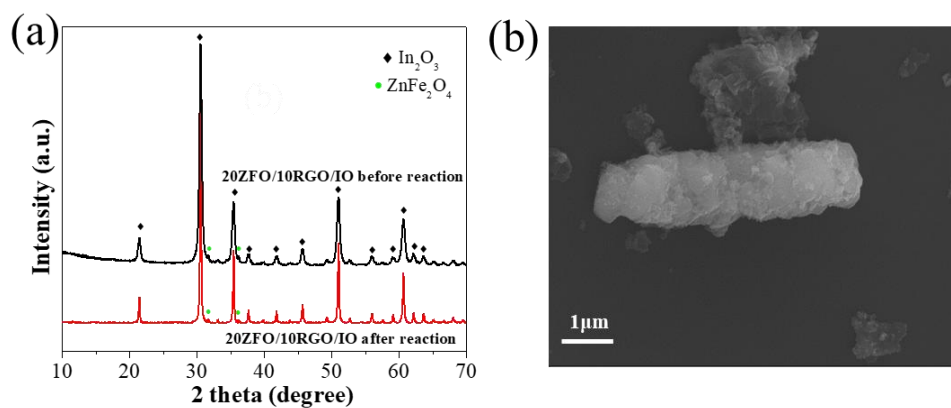

**Figure S7.** XRD patterns (a) and SEM image of 20ZFO/10RGO/IO after photocatalytic experiment.

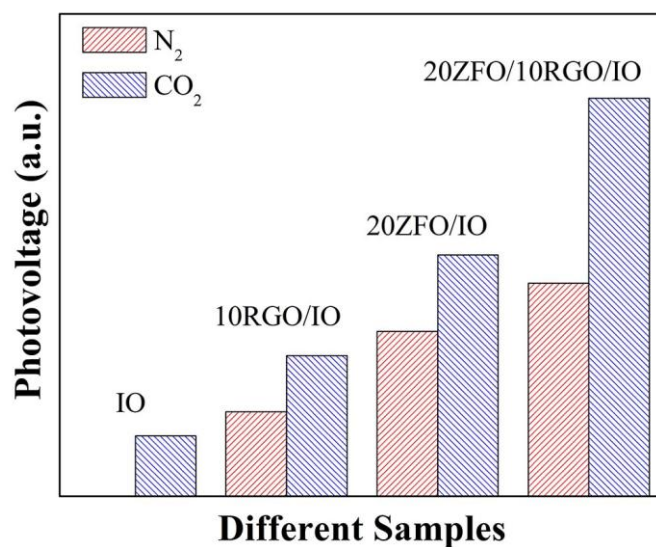

**Figure S8.** The intensities of SS-SPS response peak at 360 nm in different atmospheres of IO, 10RGO/IO, 20ZFO/IO and 20ZFO/RGO/IO samples.

**Table S1** Performance comparison of our work with other Z-scheme photocatalytic systems for CO<sub>2</sub> reduction.

| Photocatalyst                                                        | Light Source                                                   | Major Product         | Yield<br>( $\mu\text{molg}^{-1}\text{h}^{-1}$ ) | Reference |
|----------------------------------------------------------------------|----------------------------------------------------------------|-----------------------|-------------------------------------------------|-----------|
| ZnFe <sub>2</sub> O <sub>4</sub> /RGO/In <sub>2</sub> O <sub>3</sub> | 300 W Xenon<br>arc lamp                                        | CO<br>CH <sub>4</sub> | 8.85<br>1.95                                    | This work |
| ZnIn <sub>2</sub> S <sub>4</sub> /TiO <sub>2</sub>                   | 300 W Xenon<br>arc lamp<br>1KW                                 | CH <sub>4</sub>       | 1.135                                           | 1         |
| Cu <sub>2</sub> O/TiO <sub>2</sub>                                   | high-pressure<br>Hg (Xe) lamp<br>300 W Xenon                   | CO                    | 2.11                                            | 2         |
| ZnPc/BiVO <sub>4</sub>                                               | lamp cut off UV<br>( $\lambda > 420\text{nm}$ )<br>300 W Xenon | CO<br>CH <sub>4</sub> | 0.98<br>0.145                                   | 3         |
| CdS/WO <sub>3</sub>                                                  | lamp cut off UV<br>( $\lambda > 420\text{nm}$ )                | CH <sub>4</sub>       | 1.02                                            | 4         |

## Reference

1. G. Yang, D. Chen, H. Ding, J. Feng, J. Z. Zhang, Y. Zhu, S. Hamid and D. W. Bahnemann, *Appl. Catal., B*, 2017, **219**, 611-618.
2. M. E. Aguirre, R. Zhou, A. J. Eugene, M. I. Guzman and M. A. Grela, *Appl. Catal., B*, 2017, **217**, 485-493.
3. J. Bian, J. Feng, Z. Zhang, Z. Li, Y. Zhang, Y. Liu, S. Ali, Y. Qu, L. Bai, J. Xie, D. Tang, X. Li, F. Bai, J. Tang and L. Jing, *Angew. Chem. Int. Ed.*, 2019, **58**, 10873-10878.
4. J. Jin, J. Yu, D. Guo, C. Cui and W. Ho, *Small*, 2015, **11**, 5262-5271.
